# Supplementary material
Source: Springer Nature journal article supplement (https://www.springermedizin.de/resource/supplementary/13058_2011_2869_MOESM7_ESM.pdf/9702758)

**A****All cases (n=190)****Surgery + adjuvant therapy (n=138)**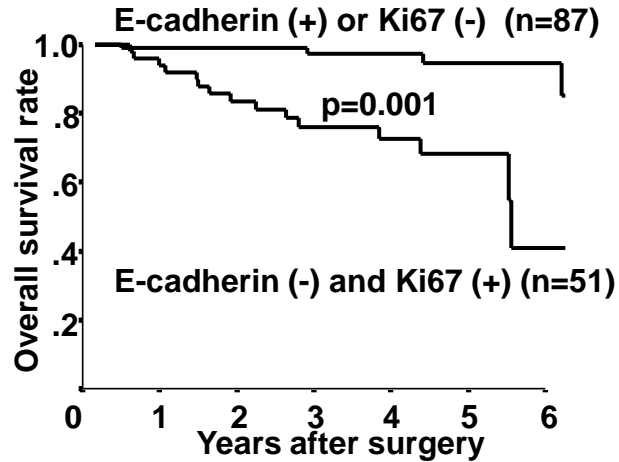**Surgery alone (n=52)**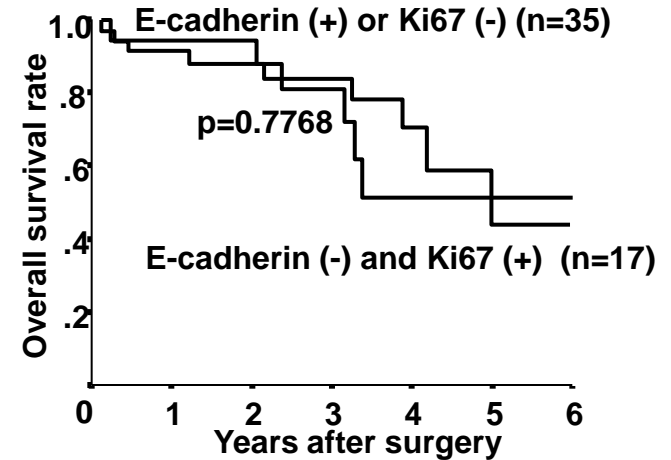**B****Stage II cases (n=107)****Surgery + adjuvant therapy (n=85)**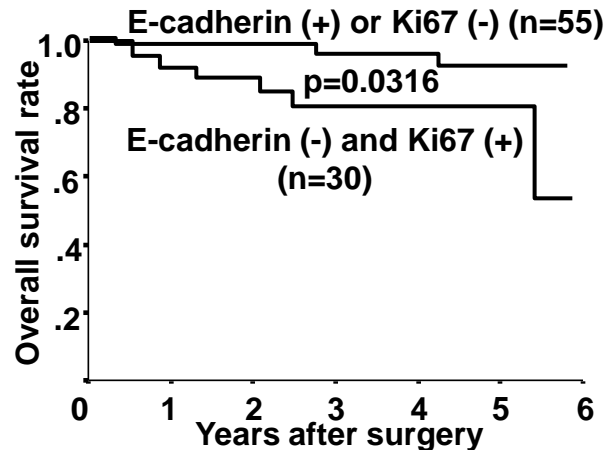**Surgery alone (n=22)**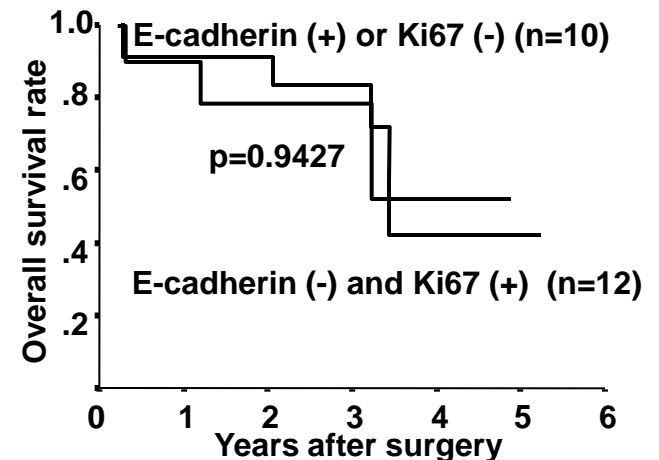

Supplement: MOESM7 [file 9702758]
